# Supplementary material for: Metabolic Footprints and Molecular Subtypes in Breast Cancer
Source: Dis Markers. 2017 Dec 24;2017:7687851. doi: 10.1155/2017/7687851 (PMC5757146; doi:10.1155/2017/7687851)
Supplement: Supplementary Materials — Raw data on metabolites. [file 7687851.f1.xlsx]

## Sheet: Foglio1
	144	694	651	10050	611	327	10056	10037	675	693	237	642	668	10005	529	10004	225	232	471	10010	522	10002	10043	660	545	556	10001	10030	286	591	613	387	533	597	493	607	10034	608	255	582	601	10022	513	334	10053	405	592	511	429
Subtype	Basal	Basal	Basal	Basal	Basal	Basal	Basal	Basal	Basal	Her2	Her2	Her2	Her2	Her2	Her2	Her2	LumA	LumA	LumA	LumA	LumA	LumA	LumA	LumA	LumA	LumA	LumA	LumA	LumA	LumA	LumA	LumA	LumA	LumA	LumA	LumA	LumA	LumA	LumA	LumA	LumA	LumA	LumA	LumA	LumA	LumA	LumA	LumA	LumA
Glucose	6593719	21177564	35780420	26966516	13115722	26870712	43179864	15105903	56587724	24495354	28507768	28580090	40822640	13931419	31652510	8080385	21989392	14469883	35383760	31098068	38923976	13649027	26679362	17555690	35081552	31020294	39048968	10374649	28136098	39946764	15585430	11482623	29753486	27035918	32533856	27423900	17706934	31445632	31379664	19921440	16881844	40721484	14470549	21608566	21008840	39525900	34797204	23816942	42685188
glucose-6-phosphate (G6P)	13205956	8977463	10890508	25599768	13994653	24320296	12463107	5956644	13708990	25334698	7017181	12262627	401867	31084960	11851604	377564	6620425	1079390	11801190	636201	5673828	161291	2050653	4500310	6745272	11170924	401897	2600200	3646703	4427725	10259538	4991739	3628795	10514149	10325567	6949498	5390853	1030384	1263004	4289964	2535174	36323480	543284	3506868	5352855	17081150	1823917	12247715	7342968
fructose	538689	646988	1003022	2444684	1699918	2484801	1010172	992275	893490	3215802	527954	782512	1442040	1632235	3762979	403355	606428	118812	2590591	1505420	1172775	992644	1131875	798017	1620335	1169426	3053240	270105	1420881	1986314	1067090	524620	304968	1067558	1573635	1319074	1785879	994911	408787	208580	1039613	15944824	334923	789354	564257	1493773	379987	2968246	2385496
fructose-6-phosphate	3441350	1861113	3420436	6500883	3139358	7710368	3531168	2140347	4245821	6007250	1885385	3942055	195190	7177067	3418506	285411	2085454	355587	3397270	373680	2028833	103897	1020564	1122453	2063731	4152728	156283	857033	1068233	2221415	3222408	1481415	1359511	2838740	3026476	1833160	1759453	422029	516633	1229826	1372577	9037468	415171	860696	1638555	5393031	774609	3421637	2281324
fructose 1,6-biphosphate	33410	16930	13991	54684	150686	192299	164273	81175	12595	215360	30396	22792	4077	192965	129680		13781	7118	76045		50161			7210	22479	62142		49483	5340	8146	37893	8375	21844	60457	30396	45126	19457		11188	26398	4877	70825	5603	16724	12015	83495	16445	57995	26652
lactate	339147008	164691360	237993504	505710272	560794176	505398368	359773600	223048272	119380096	634326144	276809984	351447104	57859104	417255296	453830112	124581192	197542240	52906532	194943168	78214320	296529888	22046152	213580432	97995408	148063248	238604864	23304106	141226912	153607968	156048624	418421632	129310864	78892104	288713024	368085472	271910496	342771136	140781536	105854104	176309760	108605752	541494208	158853584	283346208	256418416	354323104	217342336	179467392	330219808
ribulose 5-phosphate, xylulose 5-phosphate	473905	313730	266929	672374	835001	690518	729445	509772	460256	1584943	363116	609174	44885	1072264	1047311		499200	47511	345108	34872	321837	11666	135004	413081	204566	1331211	33941	116373	205609	341981	420282	183252	341383	663147	647530	261540	189156	37454	75258	352548	167737	647777	23140	247086	228255	449958	130916	563426	369808
sedoheptulose-7-phosphate	49453	38046	83658	169965	38119	150659	49274	33879	130900	131194	18112	87900	16300	125520	42720	11238	51483	9388	89095	8359	38963	6584	35224	30563	50256	101898	18201	15794	40459	69078	64925	50133	56596	62666	100501	119278	37978	10876	13289	21305	52205	243776	12060	12898	57611	141158	17215	54136	67927
guanine	1767806	912844	932616	2658927	2043700	1757914	1288044	123857	1143024	1766250	1063964	893153	55626	2403002	1112922	211357	840285	351345	548021	188847	828676		548334	328048	855053	1254750	64755	606507	834913	790358	1547813	544471	518101	843604	767462	801626	936763	332075	237309	531511	484997	1347208	241181	760093	531173	1077409	458067	1374221	675902
adenosine	23029	36884	9743	49525	34089	38187	42320	11614	43643	14560	11263	13276		21853	42238	3632	27868	2716	17445		6991			20237	22754	3784	4458	5616	3354	13071	19731	7981	18267	25887	8661	31678	16836		3745	8969		49655	4658	6272	25282	21301	5716	29701	15088
tryptophan	3565474	1514907	1809932	5966085	2858480	3659480	1505580	1413764	1706110	4722019	1799191	2486971	743323	3966194	2376033	672332	1789059	973223	1223863	1959202	2375595	101371	1246303	1476571	2007144	1623191	249920	345815	1962103	1899776	4231579	2453145	2086667	2163029	2162867	1659843	2751268	960134	704875	1785763	1257720	3846272	834492	1634983	1449358	2913674	1486489	2021529	2073934
kynurenine	422856	117300	896967	743270	1301698	1450058	834739	531028	66064	231209	71407	150998	58365	518263	478357	42273	79865	96892	47725	36650	103508	53891	114467	64043	63337	411879	21705	291051	55205	56404	146939	79246	36746	187384	74651	76427	160258	46900	44936	66824	126811	261458	45355	74942	75827	129896	44758	190339	47868
quinolinate	51596	24406	461510	466345	118194	2137183	201235	76623	60860	234556		52165	13391	605244	132047	32568	31324			18504	723306		56949	30103	17643	354754		30399	36944	21079	150506				36343		19873	22251			24054			16617		20433	20435	100553
oleate (18:1n9)	68911336	13747208	20716058	49239400	56625212	22562860	60079140	28474518	23772626	86843368	27637456	40322028	7039258	42230600	26158228	5747382	11946175	4581169	25975732	5597221	50441848	1707598	15095169	8157446	12251690	39254612	2415374	21008670	10140483	10446568	21446152	20545194	6952456	9851991	20926282	11302890	38005212	7142627	4305427	8270003	9753229	25244668	4329275	8947401	4805149	17674980	8669223	13926864	39714548
palmitate (16:0)	67473360	40828556	57689152	60790804	77971304	44120708	71390128	59415692	53919452	74151944	65388900	54313252	16929602	57816084	43510636	22570614	25790698	18910760	54789804	21368920	71291792	9579533	35042380	25611562	37622740	61042220	16479934	32548192	31099596	35988264	47040140	48036652	23181678	33015438	45177092	36601860	70307792	23760264	19877854	23690654	28960446	35958860	17212824	31280668	19376172	44567016	24623238	44109888	70130488
linoleate (18:2n6)	38536584	22332136	33505636	51487992	68568368	27625956	60902872	47482984	39934612	59137808	34279808	43597224	7626003	42399220	30573316	12130661	15637558	9709603	40242416	9609425	50841496	2297297	15491427	16299735	24063858	44998024	5804109	37990592	15584494	23607188	21808144	30265186	13465911	22917178	21189114	18267264	53744532	12122792	9218925	14496325	16587779	28008176	12686468	15537454	14787439	20413260	10070632	30867698	65067836
glycerol	75998840	38271772	30315892	66040496	80854160	28615618	66826988	31925516	37848928	96131544	50329328	49202868	5158170	61457036	45325268	11949005	21633402	4642682	33271122	7686762	83277008	3874842	19908440	30253504	19916862	45920336	3647783	30009898	13278487	19321254	42423064	29174758	31971512	23599788	36014276	20422832	55560064	9225665	8439117	20242158	14747426	50325292	13503488	18325358	13555943	25178866	17041910	40760316	58261748
palmitoylcarnitine	77747	398457	22263	729795	1037523	1479003	716852	90377	18563	93686	58340	111113	57606	470033	249358		45269	40737	154527	15465	176952	21962	14877	69409	34740	234285	20410	60792	81732	33186	23354	38917	7577	17449	11240	9816	50125	60545		166608	43457	148082	97716	23279		148916	12321	9544	41835
stearoylcarnitine	91912	253540	12389	558862	832404	1247667	409359	87381		102067	51642	105705	23881	514873	240418	17741	10164	30431	107536		165552		20330	35078		197891		24995	59416			15284			11095		10194	36520		70341	28022	216391	51265	21290	18668	113279		13980
oleoylcarnitine	45790	519626	24534	254173	352607	307035	504712	81385	55548	33703	51808	68915	63562	216943	155543		42519	66025	105575	31797	236200	22832	16457	172817	31215	136571	43172	28024	40693	34049	38009	28740	17650		20503		55581	57327	24497	84025	72995	119269	102959	38563	13259	48068	19016	28167	32193
3-hydroxybutyrate (BHBA)	1612298	1722171	6638732	730546	1157993	1208185	931327	1558002	943318	3904546	830309	2139369	295776	2085098	2414959	1311852	531602	214347	365132	1005727	382370	165700	2410532	189340	611824	485530	138834	861382	550618	322643	1653257	636253	883376	739459	2767868	320829	486453	468353	1596474	795477	258613	302631	6516840	840604	2520398	700425	1658824	1545041	694997
3-hydroxy-3-methylglutarate	41996		39886	80312	96647	110926	46573	27048	25811	603370		143202	12697	220320	78914	18759				21599	38767			4995	13547	23760					42786			28966	32564		18180			21704		24275	20169		35331	31907		11895
stearoyl sphingomyelin	1273254	786096	1283808	1873777	2403543	1374162	1112225	603460	651696	1117373	955507	1257473	337187	2658868	802701	679005	1048546	351416	771518	307124	919358	808038	769790	841830	613028	1147198	324047	737131	268159	1056498	3414401	680444	781170	1181697	866920	484635	393740	517160	439524	978480	403069	884106	210022	318703	1160270	943203	554862	696738	752479
palmitoyl sphingomyelin	24784314	10165687	15037423	45093404	59021740	64047684	33891496	12363790	15501760	39663896	16016598	29695062	5005874	58316616	21603198	2377163	18950082	4399075	15959467	3115278	25684956	1472478	9572133	4791619	12800205	17866202	2228162	11169469	4497778	9099169	33458598	7296732	5512440	20414102	8429384	9029837	8295029	5685541	5314316	9411300	3773562	29028484	2622430	4622060	17075822	15637528	6791685	13742172	13284387
ethanolamine	11581394	13499826	13676314	29643912	17687750	34098448	6171393	5527625	9656901	15181661	5645202	9913746	2840642	15284469	7331188	1169766	11600247	1049167	3434578	817086	7427186	248038	8434642	2968485	4350603	5878321	446250	1726417	5899423	5941533	38427968	2821915	2483759	6294731	7658990	5376960	7446732	10713335	1896525	3662032	2504537	14094874	5483013	4593852	5173628	10213580	3827826	15980200	5176498
cytidine 5'-diphosphocholine	368901	65620	117761	362472	421422	263086	371760	83814	65000	369031	78398	161981		211395	262091	6534	82316	16623	53778	6929	132579		62791	15679	43074	173881		38439	70384	25721	82847	60215	18375	92990	114049	121555	80905	27107	3370	12299	27806	235884	9027	117251	82312	26593	20967	21767	121837
phosphoethanolamine	311061	163749	189272	318182	336859	489342	283005	329694	200325	326562	335803	241545	47585	453540	248626	39271	247759	88682	221892	75813	314435	20280	100046	84100	191088	327979	47032	238335	96425	204439	275525	167192	99823	260578	189507	354270	220837	53446	136883	164748	190713	495364	45369	215870	248786	226698	131013	231033	212827
[truncated: 43 more columns]
